# Supplementary material for: Phosphoproteomic Analysis of Two Contrasting Maize Inbred Lines Provides Insights into the Mechanism of Salt-Stress Tolerance
Source: MDPI journal article supplement (doi:10.3390/ijms20081886), 2019-04-16
Supplement: s1 [file s1]

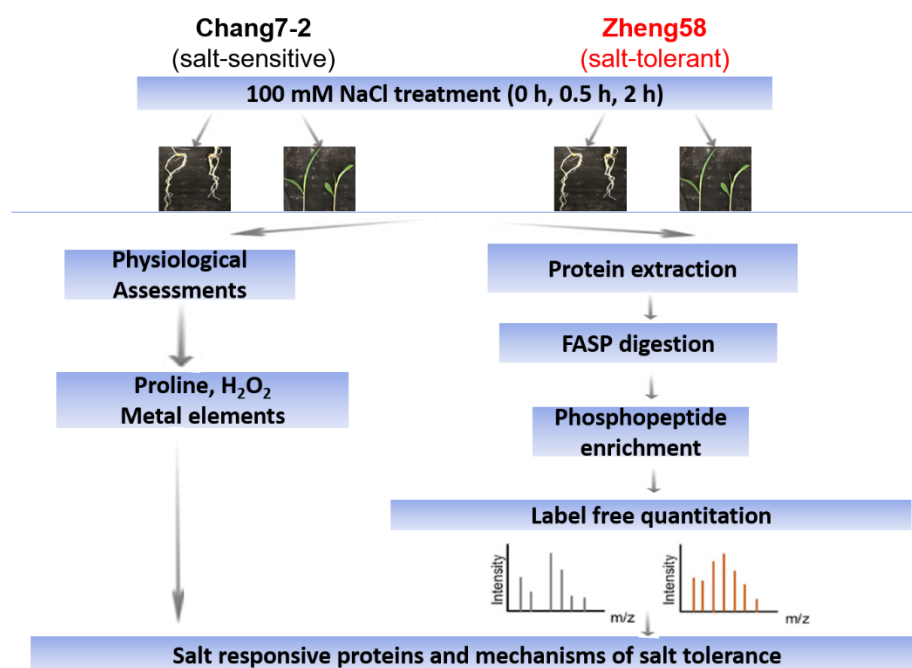

Figure S1. Workflow for the identification of DRPPs.

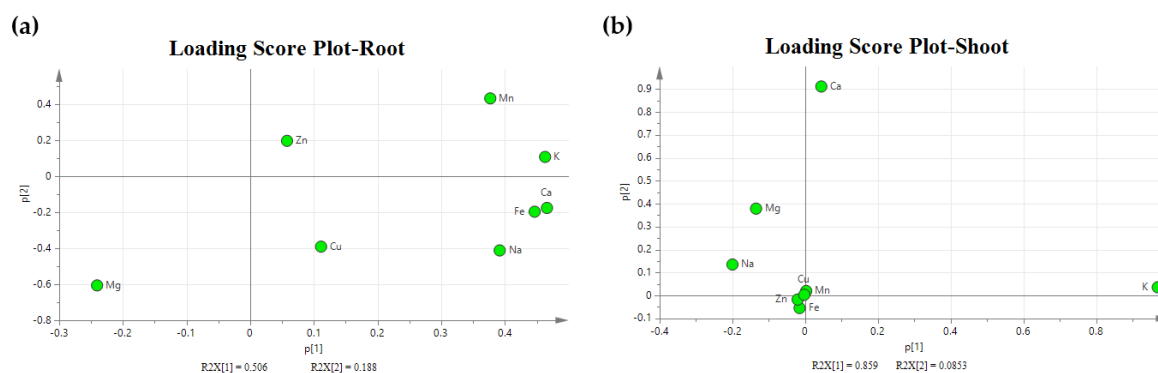

Figure S2. Loading score plot for metal elements determination in roots (a) and shoots (b) of Chang7-2 and Zheng58 after salt treatment for 0.5 h and 2 h.

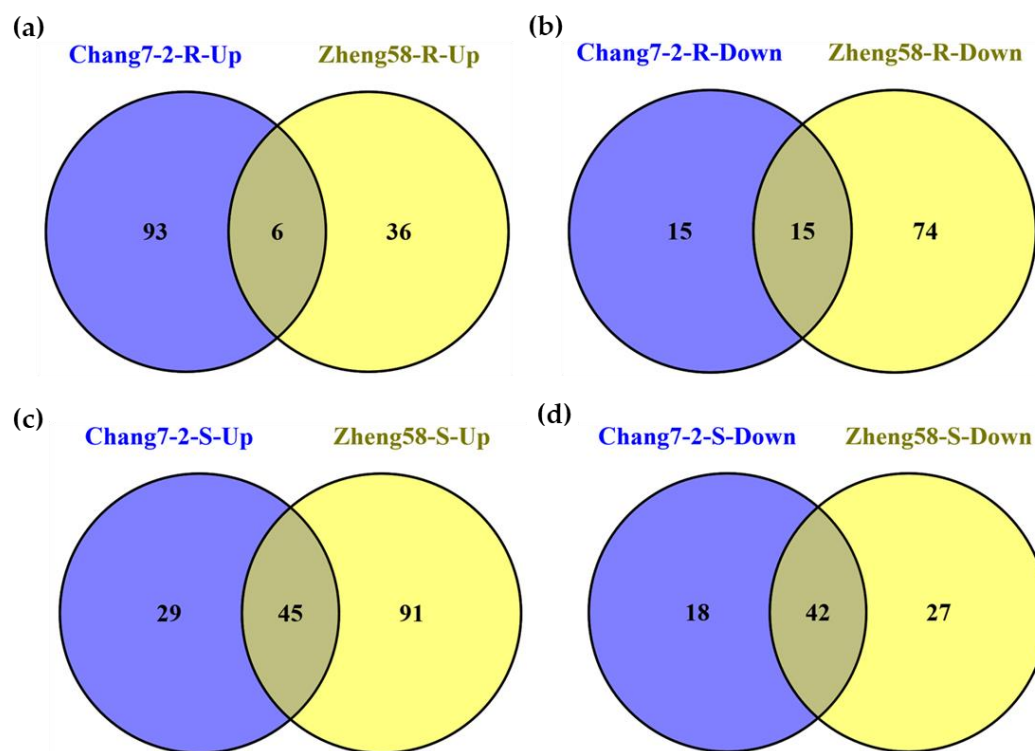

**Figure S3.** Numbers of up-regulated and down-regulated phosphoproteins in Chang7-2 and Zheng58 after salt treatment for 0.5 h and 2 h. Numbers of up-regulated and down-regulated phosphoproteins in roots (a,b) and shoots (c,d) of Chang7-2 and Zheng58.

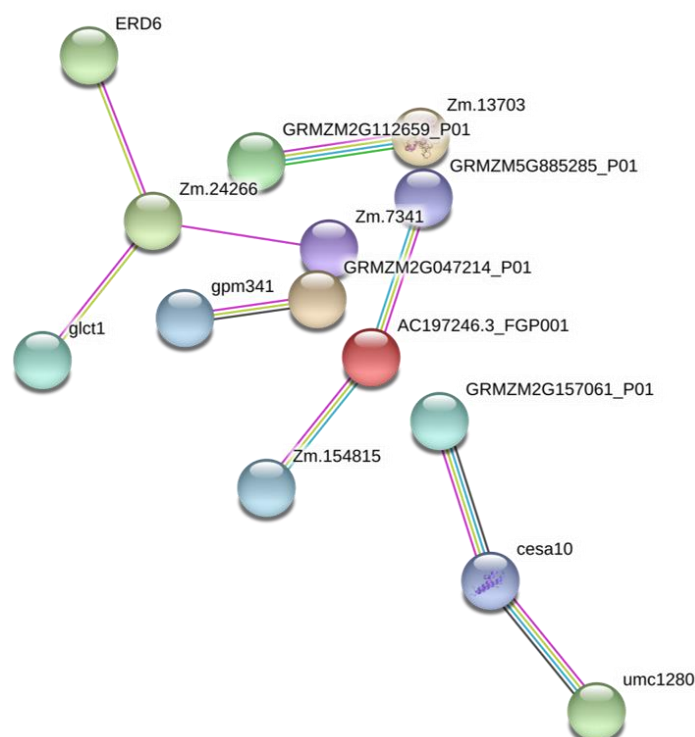

**Figure S4.** Protein interaction network of DRPPs in Chang7-2 root.

**Table S1.** Ion contents in roots and shoots of Chang7-2 and Zheng58 at three different salt treatment points (Unit: mg.g<sup>-1</sup> DW).

| Tissue | Genotype | Time  | K      | Na    | Ca     | Mg    | Mn    | Fe    | Zn    | Cu    |
|--------|----------|-------|--------|-------|--------|-------|-------|-------|-------|-------|
| root   | Chang7-2 | 0 h   | 15.094 | 1.943 | 2.549  | 8.258 | 0.235 | 0.601 | 0.087 | 0.017 |
|        |          | 0.5 h | 14.413 | 3.059 | 1.946  | 8.216 | 0.252 | 0.705 | 0.104 | 0.016 |
|        |          | 2 h   | 13.743 | 3.018 | 2.005  | 7.602 | 0.155 | 0.401 | 0.068 | 0.018 |
|        | Zheng58  | 0 h   | 20.779 | 1.466 | 2.494  | 4.351 | 0.499 | 0.479 | 0.089 | 0.016 |
|        |          | 0.5 h | 25.754 | 4.454 | 19.417 | 6.512 | 0.529 | 1.042 | 0.098 | 0.020 |
|        |          | 2 h   | 31.408 | 5.175 | 13.218 | 5.811 | 0.402 | 1.080 | 0.075 | 0.016 |
| shoot  | Chang7-2 | 0 h   | 47.722 | 1.314 | 6.334  | 5.086 | 0.114 | 0.067 | 0.054 | 0.014 |
|        |          | 0.5 h | 51.729 | 1.519 | 6.197  | 4.730 | 0.105 | 0.085 | 0.042 | 0.015 |
|        |          | 2 h   | 44.795 | 2.016 | 7.038  | 4.127 | 0.075 | 0.052 | 0.037 | 0.008 |
|        | Zheng58  | 0 h   | 72.088 | 0.523 | 6.895  | 3.679 | 0.096 | 0.050 | 0.027 | 0.010 |
|        |          | 0.5 h | 57.291 | 0.506 | 6.626  | 3.707 | 0.098 | 0.049 | 0.028 | 0.012 |
|        |          | 2 h   | 56.704 | 1.055 | 8.407  | 4.476 | 0.102 | 0.039 | 0.028 | 0.014 |

**Table S2.** Numbers of identified or quantified PSMs, unique phosphopeptides, phosphoproteins and phosphorylation sites in roots and shoots.

|                                   | Root  | Shoot | Overlap | Total |
|-----------------------------------|-------|-------|---------|-------|
| Phosphoproteins PSMs (1% FDR)     | 36635 | 40119 | —       | —     |
| Proteins identified               | 3432  | 3482  | 2108    | —     |
| Phosphoproteins quantified        | 3084  | 2986  | 1954    | 4116  |
| Unique phosphopeptides quantified | 9772  | 11062 | 5375    | —     |
| Unique phosphorylation sites      | 7175  | 7394  | 5121    | 9448  |
